# Supplementary material for: Ameliorating La0.5Sr1.5MnO4 with Ni-doping to enhance cathode electrocatalysis for proton-conducting solid oxide fuel cells
Source: Royal Society of Chemistry journal article supplement (doi:10.1039/d3ma01133j), 2024-01-01
Supplement: d3ma01133j1.pdf [file d3ma01133j1.pdf]

**Ameliorating  $\text{La}_{0.5}\text{Sr}_{1.5}\text{MnO}_4$  with Ni-doping to enhance cathode electrocatalysis  
for proton-conducting solid oxide fuel cells**

Jiapeng Xu <sup>a</sup>, Junyi Gong <sup>a</sup>, Kunpeng Du <sup>a</sup>, Wei Liu <sup>b</sup>, Jie Hou <sup>a\*</sup>

<sup>a</sup> School of Resource Environment and Safety Engineering, University of South China,  
Hengyang 421001, China

<sup>b</sup> CAS Key Laboratory of Materials for Energy Conversion and Collaborative  
Innovation Center of Suzhou Nano Science and Technology, University of Science and  
Technology of China, Hefei 230026, China

---

\* Corresponding authors: [jiehou@usc.edu.cn](mailto:jiehou@usc.edu.cn) (J. Hou)

Table S1 The lattice spacing ( $d_{hkl}$ ) of LSMN and LSMO based on the Rietveld refinement results shown in Fig. 1(a) and Fig. 1(b).

| Lattice Planes<br>(hkl) | LSMO    |        | LSMN    |        |
|-------------------------|---------|--------|---------|--------|
|                         | 2 Theta | d-hkl  | 2 Theta | d-hkl  |
| 101                     | 3.68145 | 24.12  | 3.6568  | 24.221 |
| 004                     | 3.10336 | 28.708 | 3.11586 | 28.526 |
| 103                     | 2.82054 | 31.662 | 2.81402 | 31.674 |
| 110                     | 2.72581 | 32.794 | 2.70479 | 32.993 |
| 112                     | 2.49574 | 35.919 | 2.48116 | 36.074 |
| 105                     | 2.08726 | 43.277 | 2.0884  | 43.188 |
| 006                     | 2.06891 | 43.681 | 2.07724 | 43.433 |
| 114                     | 2.04799 | 44.151 | 2.04256 | 44.211 |
| 200                     | 1.92744 | 47.076 | 1.91257 | 47.4   |
| 202                     | 1.84073 | 49.44  | 1.8284  | 49.732 |
| 211                     | 1.70757 | 53.592 | 1.69477 | 53.966 |
| 116                     | 1.64797 | 55.697 | 1.64746 | 55.651 |
| 204                     | 1.63734 | 56.09  | 1.63    | 56.302 |
| 107                     | 1.61105 | 57.089 | 1.61419 | 56.904 |
| 213                     | 1.59136 | 57.863 | 1.58181 | 58.182 |
| 008                     | 1.55168 | 59.49  | 1.55793 | 59.163 |
| 215                     | 1.41604 | 65.872 | 1.41046 | 66.102 |
| 206                     | 1.41027 | 66.176 | 1.40701 | 66.285 |
| 220                     | 1.36291 | 68.792 | 1.35239 | 69.339 |
| 118                     | 1.3485  | 69.633 | 1.35    | 69.48  |
| 222                     | 1.33119 | 70.673 | 1.32163 | 71.198 |
| 109                     | 1.29865 | 72.723 | 1.30212 | 72.434 |
| 301                     | 1.27813 | 74.084 | 1.26843 | 74.684 |
| 224                     | 1.24787 | 76.198 | 1.24635 | 76.244 |
| 0010                    | 1.24134 | 76.671 | 1.24058 | 76.663 |
| 217                     | 1.23611 | 77.055 | 1.23357 | 77.18  |
| 303                     | 1.22715 | 77.724 | 1.21893 | 78.284 |
| 310                     | 1.21902 | 78.341 | 1.20962 | 79.005 |
| 208                     | 1.20868 | 79.143 | 1.20791 | 79.139 |
